# Supplementary material for: “It’s okay because I’m just driving”: an exploration of self-reported mobile phone use among Mexican drivers
Source: PeerJ journal article supplement (doi:10.7717/peerj.16899), 2024-02-23
Supplement: ENGLISHQuestionnaire.pdf [file ENGLISHQuestionnaire.pdf]

Appendix 1.  
Questionnaire structure (draft - researcher form)

Section I.

1- Can you tell me your city of provenance? \_\_\_\_\_

2- Can you tell me your age? \_\_\_\_\_

3- Sex:

- ☐ Man
- ☐ Woman
- ☐ Other
- ☐ Prefer not to say

4- Do you have a driver's license? (Filter question)

- ☐ Yes
- ☐ No

5- Do you drive at least once a week? (Filter question)

- ☐ Yes
- ☐ No

Section II.

6- To what degree do you consider the use of cell phones while driving to be risky?, on a scale of 1 to 5 (where 1 is not at all and 5 is high risk)

|            |   |   |   |   |   |           |
|------------|---|---|---|---|---|-----------|
| Not at all | 1 | 2 | 3 | 4 | 5 | High risk |
|            |   |   |   |   |   |           |

7- Could you please indicate how often you use your cell phone while driving in the last 30 days? on a scale of 0 to 4 (where 0 is never and 4 is always I drive)

|       |   |   |   |   |   |                |
|-------|---|---|---|---|---|----------------|
| Never | 0 | 1 | 2 | 3 | 4 | Always I drive |
|       |   |   |   |   |   |                |

Have you used your cell phone in the following traffic situations in the last 30 days?

|                                                            | Yes | No |
|------------------------------------------------------------|-----|----|
| 8- Stopping at a traffic light                             |     |    |
| 9- Driving in intermittent traffic                         |     |    |
| 10- Driving at low speed                                   |     |    |
| 11- Driving faster than 25 miles or 40 kilometers per hour |     |    |

12- Why do you use your cell phone while driving in the last 30 days? (you can indicate more than one option)

- ☐ Voice calling
- ☐ Reading texts
- ☐ Composing texts or texting
- ☐ Map browsing
- ☐ Social networking
- ☐ Reading emails
- ☐ Writing emails

How often have you performed the following behaviors while driving in the last 30 days? on a scale of 0 to 4 (where 0 is never and 4 is always I drive)

|                                | Never 0 | 1 | 2 | 3 | 4 Always I drive |
|--------------------------------|---------|---|---|---|------------------|
| 13- Voice calling              |         |   |   |   |                  |
| 14- Reading texts              |         |   |   |   |                  |
| 15- Composing texts or texting |         |   |   |   |                  |
| 16- Map browsing               |         |   |   |   |                  |
| 17- Social networking          |         |   |   |   |                  |
| 18- Reading emails             |         |   |   |   |                  |
| 19- Writing emails             |         |   |   |   |                  |

20- For what reason have you used your cell phone while driving in the last 30 days?

---

21- Have you ever had a phone-enhanced driving crash?"

- ☐ No
- ☐ Nearly
- ☐ Yes
